# Supplementary material
Source: PubMed Central journal article supplement (PMC2700905)
Supplement: 0900174106_ST1_PDF.pdf [file 0900174106_ST1_PDF.pdf]

**Table S1. Simulation of microtissue forces**

|                                         | Cantilever stiffness, $k = 0.098 \mu\text{N}/\mu\text{m}$ |                    | Cantilever stiffness, $k = 0.397 \mu\text{N}/\mu\text{m}$ |                    |
|-----------------------------------------|-----------------------------------------------------------|--------------------|-----------------------------------------------------------|--------------------|
|                                         | Experiments                                               | Simulations        | Experiments                                               | Simulations        |
| <b>E=5 kPa</b><br><b>(CD=1.0mg/ml)</b>  | $5.13 \pm 0.25 \mu\text{N}$                               | $4.10 \mu\text{N}$ | $7.92 \pm 0.47 \mu\text{N}$                               | $8.30 \mu\text{N}$ |
| <b>E=25 kPa</b><br><b>(CD=2.5mg/ml)</b> | $5.77 \pm 0.31 \mu\text{N}$                               | $4.45 \mu\text{N}$ | $10.25 \pm 0.44 \mu\text{N}$                              | $10.8 \mu\text{N}$ |

CD: Collagen Density,  $\sigma_{max} = 250 \text{ kPa}$  for all cases, experimental measurements are  $\pm$  standard error on the mean
