# Supplementary material
Source: PubMed Central journal article supplement (PMC2700905)
Supplement: 0900174106_ST2_PDF.pdf [file 0900174106_ST2_PDF.pdf]

**Table S2.  $\mu$ TUG fabrication parameters**

| Step | Procedure             | Specifications | Time   | Notes                           |
|------|-----------------------|----------------|--------|---------------------------------|
| 1)   | Spin SU8-2050         | 500 RPM        | 90 s   | 84 RPM/s acceleration           |
|      |                       | 2200 RPM       | 60 s   | 336 RPM/s acceleration          |
| 2)   | Soft Bake             | 65 degrees C   | 10 min |                                 |
|      |                       | 95 degrees C   | 30 min |                                 |
| 3)   | Cool to 25 degrees C  |                |        |                                 |
| 4)   | Expose Lower Section  | 200 mJ         |        | *Through U-360 filter (HOYA)*   |
| 5)   | Spin SU8-2100         | 500 RPM        | 120 s  | 84 RPM/s acceleration           |
|      |                       | 1500 RPM       | 90 s   | 336 RPM/s acceleration          |
| 6)   | Soft Bake             | 65 degrees C   | 10 min |                                 |
|      |                       | 95 degrees C   | 30 min |                                 |
| 7)   | Cool to 25 degrees C  |                |        |                                 |
| 8)   | Spin dSU8-2007-15%    | 500 RPM        | 10 s   | resist=15% S-1813, 85% SU8-2007 |
|      |                       | 1000 RPM       | 30 s   |                                 |
| 9)   | Soft Bake             | 65 degrees C   | 2 min  |                                 |
|      |                       | 95 degrees C   | 5 min  |                                 |
| 10)  | Cool to 25 degrees C  |                |        |                                 |
| 11)  | Expose Center Section | 500 mJ         |        | *Through U-360 filter (HOYA)*   |
| 12)  | Spin SU8-2050         | 500 RPM        |        | 84 RPM/s acceleration           |
|      |                       | 2200 RPM       |        | 336 RPM/s acceleration          |
| 13)  | Soft Bake             | 65 degrees C   | 10 min |                                 |
|      |                       | 95 degrees C   | 30 min |                                 |
| 14)  | Cool to 25 degrees C  |                |        |                                 |
| 15)  | Expose Top Section    | 175 mJ         |        | *Through U-360 filter (HOYA)*   |
| 16)  | Post Exposure Bake    | 65 degrees C   | 10 min |                                 |
|      |                       | 95 degrees C   | 30 min |                                 |
| 17)  | Cool to 25 degrees C  |                |        |                                 |
| 18)  | Develop in PGMEA      | 30 degrees C   | 30 min | with agitation                  |
| 19)  | Rinse in IPA          |                | 2 min  | with agitation                  |
| 20)  | Hard Bake             | 175 degrees C  | 8 hrs  |                                 |
